# Supplementary material for: Survival of Single Positive Thymocytes Depends upon Developmental Control of RIPK1 Kinase Signaling by the IKK Complex Independent of NF-κB
Source: PubMed Central journal article supplement (PMC6382466; doi:10.1016/j.immuni.2019.01.004), 2019-02-19
Supplement: mmc1.pdf [file mmc1.pdf]

**Immunity, Volume 50**

**Supplemental Information**

**Survival of Single Positive Thymocytes Depends  
upon Developmental Control of RIPK1 Kinase**

**Signaling by the IKK Complex Independent of NF- $\kappa$ B**

**Louise V. Webb, Alessandro Barbarulo, Jelle Huysentruyt, Tom Vanden Berghe, Nozomi Takahashi, Steven Ley, Peter Vandenabeele, and Benedict Seddon**

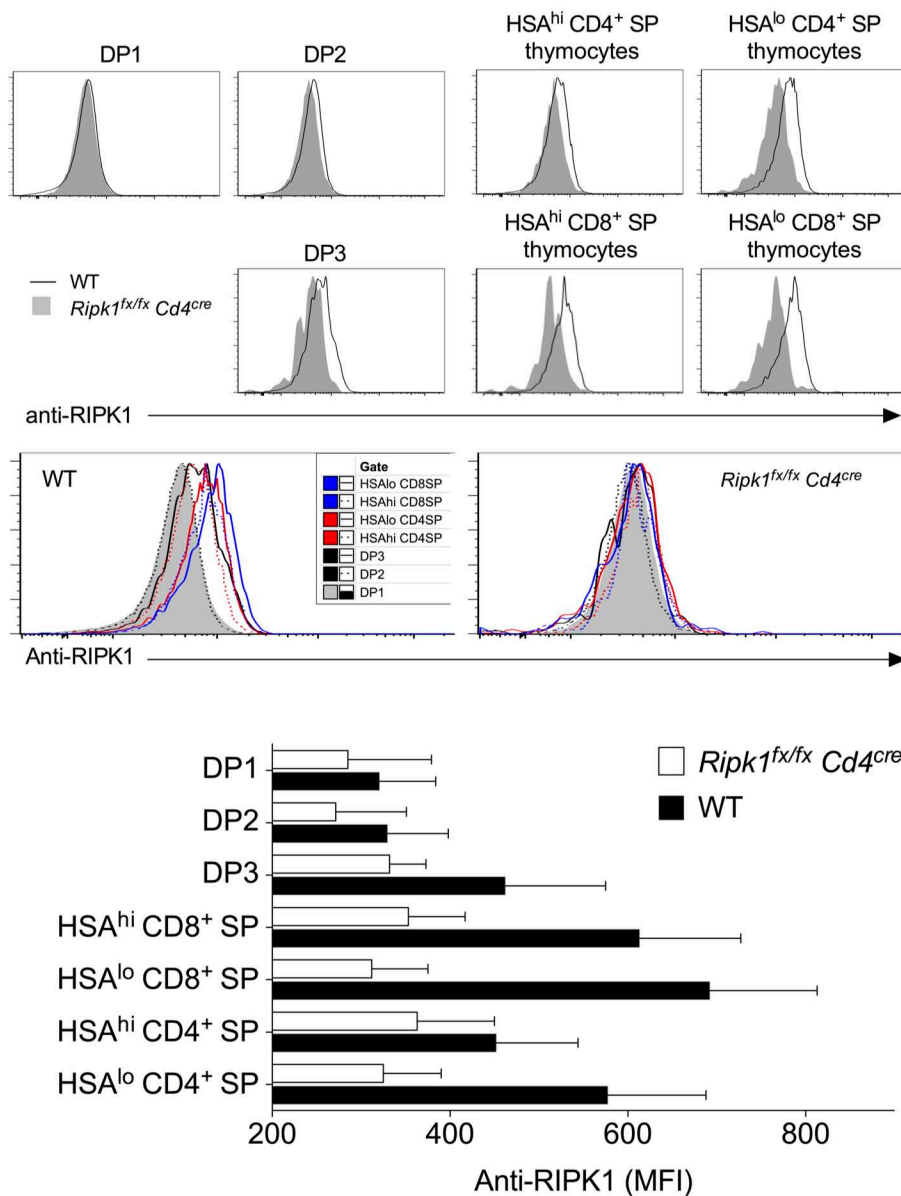

**Figure S1 - RIPK1 expression in WT controls vs RIPK1 deficient thymocytes. Related to Figure 4.** Thymocytes from 8 week old CD4<sup>Cre</sup> *Ripk1<sup>fx/fx</sup>* (n=3) and Cre<sup>-</sup> littermates (n=3) were isolated and stained for expression of CD4, CD8, TCR, CD5, HSA followed by fixation and intracellular stain for RIPK1 expression. Histograms show RIPK1 staining by thymocytes from Cre<sup>+</sup> (RIPK1 KO) and Cre<sup>-</sup> (WT), comparing either RIPK1 staining of specific thymic subsets between Cre<sup>+</sup> and Cre<sup>-</sup> mice (top two rows), or directly comparing staining of different subpopulations from Cre<sup>-</sup> (WT) and CD4<sup>Cre</sup> *Ripk1<sup>fx/fx</sup>* mice (bottom row). Subsets were gated as follows : DP1 (CD4<sup>+</sup>CD8<sup>+</sup> TCR<sup>LO</sup>CD5<sup>LO</sup>), DP2 (CD4<sup>+</sup>CD8<sup>+</sup> TCR<sup>INT</sup>CD5<sup>HI</sup>), DP3 (CD4<sup>+</sup>CD8<sup>+</sup> TCR<sup>HI</sup>CD5<sup>INT</sup>), HSA<sup>hi</sup> CD4SP (CD4<sup>+</sup>CD8<sup>-</sup> TCR<sup>HI</sup>CD5<sup>HI</sup> HSA<sup>HI</sup>), HSA<sup>lo</sup> CD4SP (CD4<sup>+</sup>CD8<sup>-</sup> TCR<sup>HI</sup>CD5<sup>HI</sup> HSA<sup>LO</sup>), HSA<sup>hi</sup> CD8SP (CD4<sup>-</sup>CD8<sup>+</sup> TCR<sup>HI</sup>CD5<sup>HI</sup> HSA<sup>HI</sup>) and HSA<sup>lo</sup> CD8SP (CD4<sup>-</sup>CD8<sup>+</sup> TCR<sup>HI</sup>CD5<sup>HI</sup> HSA<sup>LO</sup>). Bar chart shows mean fluorescence intensity of RIPK1 staining on the indicated thymic subsets from either CD4<sup>Cre</sup> *Ripk1<sup>fx/fx</sup>* (RIPK1 KO) and Cre<sup>-</sup> (WT) littermates.
